# Supplementary material for: Unveiling the dye adsorption capability of Moringa oleifera functionalized hybrid porous MOF–GO composites: in vitro and in silico ecotoxicity assessment via antibacterial and molecular docking studies
Source: Royal Society of Chemistry journal article supplement (doi:10.1039/d4ew00185k), 2024-01-01
Supplement: d4ew00185k1.pdf [file d4ew00185k1.pdf]

## Supplementary Section

### Unveiling dye adsorption capability of *Moringa oleifera* functionalized hybrid porous MOF-GO composites: *In vitro* and *in silico* ecotoxicity assessment via antibacterial and molecular docking studies

#### Graphene oxide (GO) characterization

The textural properties of GO were analyzed using SEM imaging (Fig. S1a). The representative image depicts a 2D morphology of GO with crumpled and folded textures characterized by rough surfaces and irregular edges. The composition of GO analyzed by EDS spectra confirms the presence of carbon (C) and oxygen (O) elements with an atomic percentage of 66.84 and 33.14%, respectively (Fig. S1b).

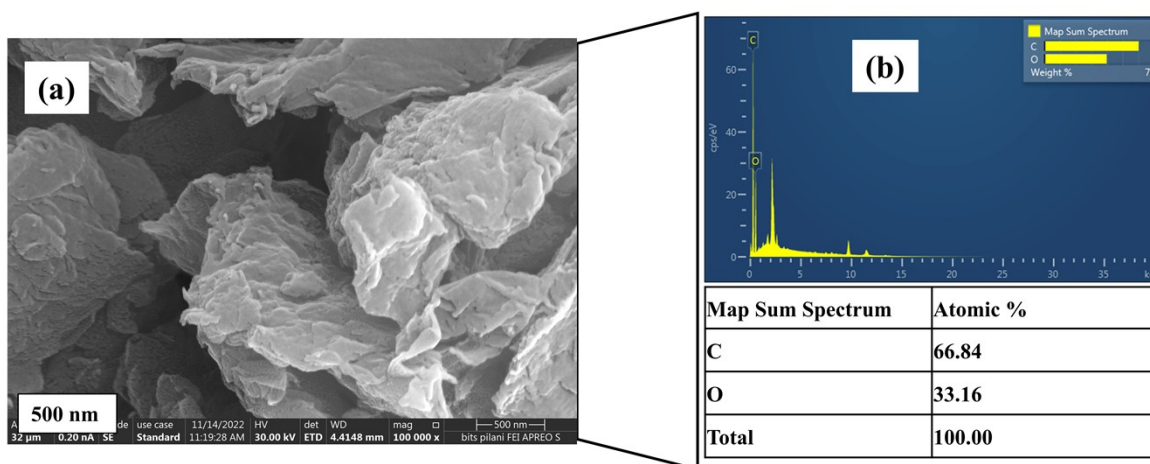

**Fig. S1** Micrographs of (a) SEM GO and (b) EDS spectra of GO.

Fig. S2 represents the recorded XRD patterns and FTIR spectra of as-prepared GO. The representative XRD pattern of synthesized GO has been shown in Fig. S2a. The peaks at  $2\theta$  values of 10.52 and 42.5 correspond to (002) and (001) planes, respectively. The obtained patterns precisely match with existing patterns of GO from the literature studies<sup>1-4</sup>. The obtained characteristic peak of GO demonstrated the high purity with an interplanar spacing distance of  $\sim 0.85$  nm, which is best suited for possible combination with the MOF materials. The FTIR analysis showed broad, sharp spectra located at  $3414\text{ cm}^{-1}$  corresponding to the O–H stretching vibration, which indicates the presence of hydroxyl (–OH) and carboxylic functional (–COOH) groups within the GO structure (Fig. S2b). The peaks observed at  $1719$  and  $1050\text{ cm}^{-1}$  were due to stretching vibrations of carbonyl (C=O) and epoxy (C–O) groups, respectively. The peak at  $1614\text{ cm}^{-1}$  was mainly due to the stretching of unoxidized graphite

present in the sample. The presence of functional groups, including hydroxyl, carboxyl, carbonyl, and epoxy, analyzed in the current sample (GO) aligns with findings from previous literature studies <sup>5,6</sup>. These results affirm the success of the experimental employment of Hummer's method in oxidizing graphite into GO. Furthermore, these findings also provide more evidence in favor of the prospective use of the produced GO in combination with MOF materials.

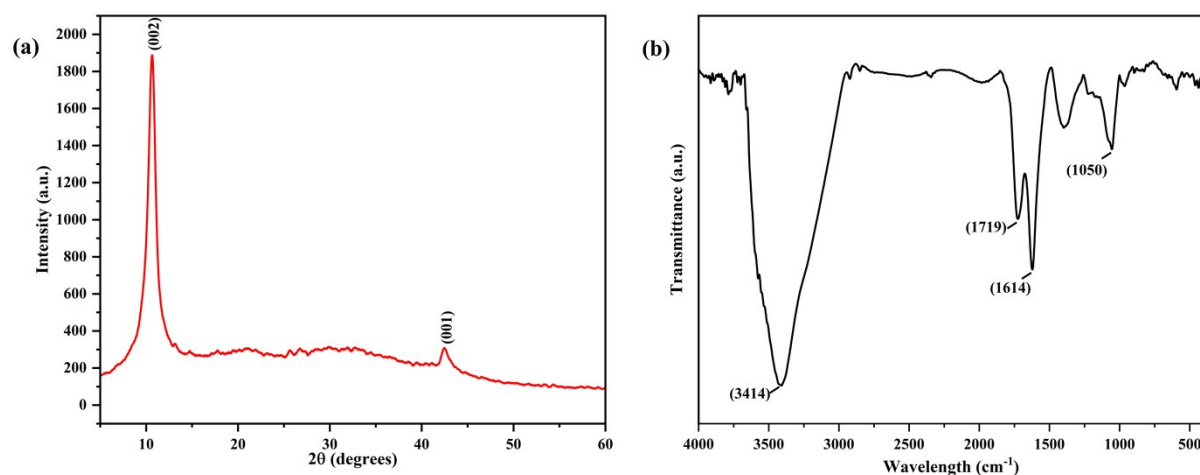

**Fig. S2** Recorded spectra of GO from (a) XRD and (b) FTIR.

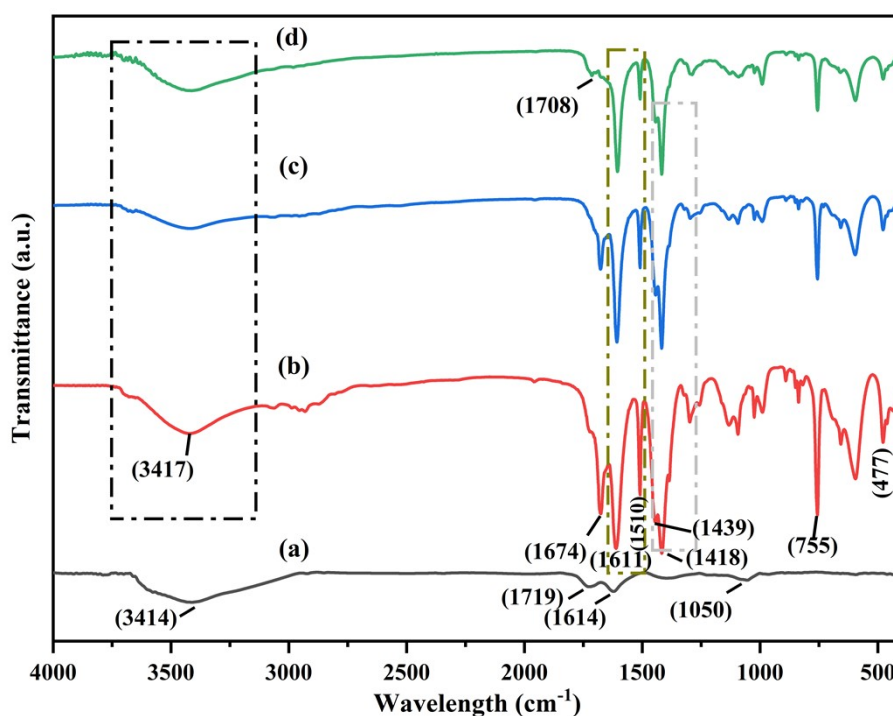

**Fig. S3** FTIR spectra of (a) GO, (b) Al-MOF, (c) AlG, and (d) AlGC.

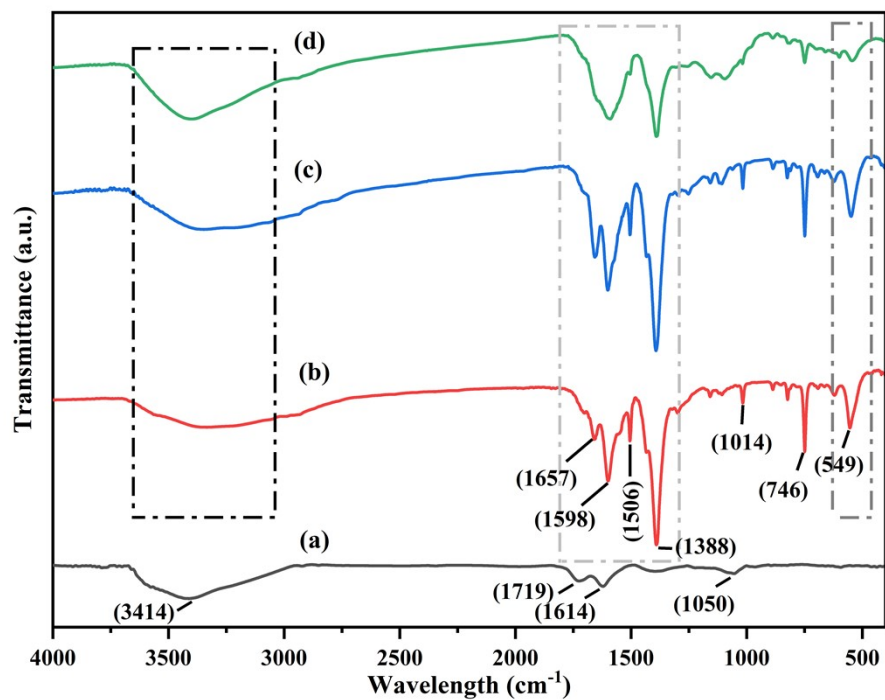

**Fig. S4** FTIR spectra of (a) GO, (b) Fe-MOF, (c) FeG, and (d) FeGC.

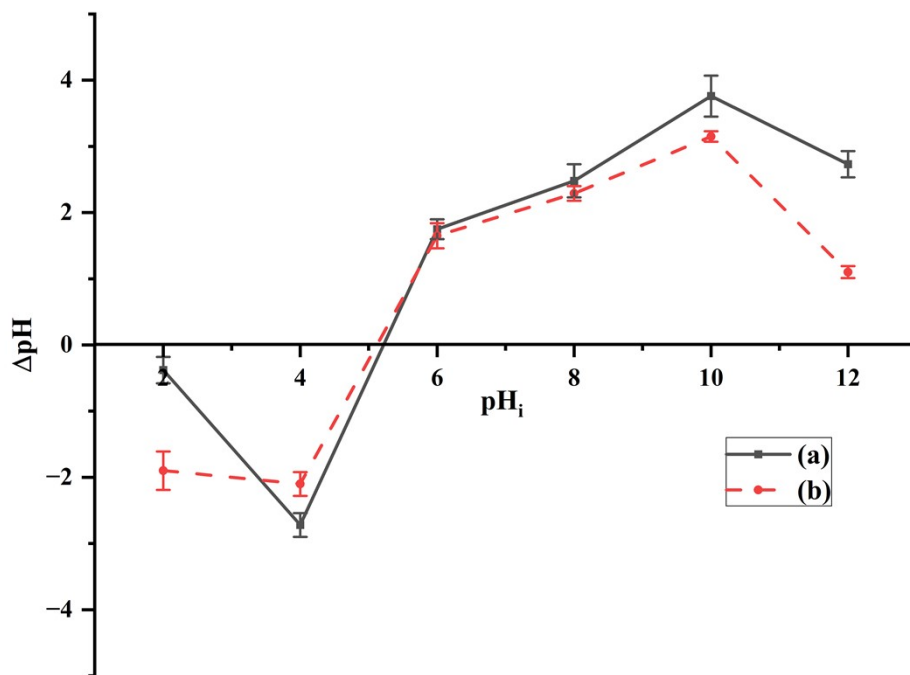

**Fig. S5** Surface charge analysis for the composite (a) AIGC and (b) FeGC.

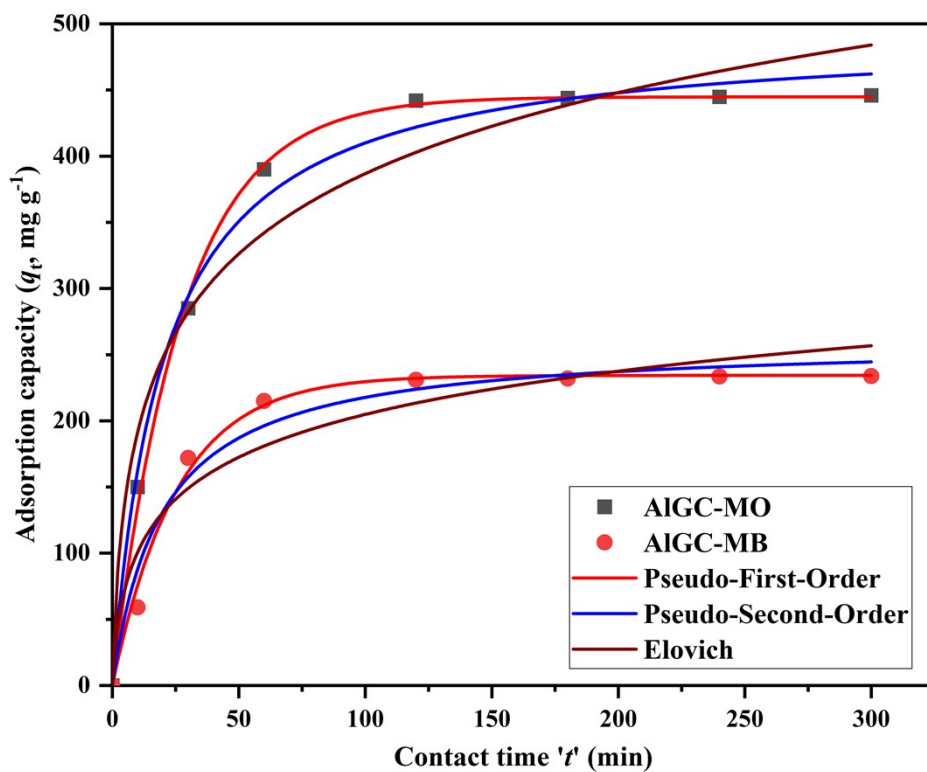

Fig. S6 Kinetic models non-linear fitting for removing MO & MB adsorption using AlGC composite.

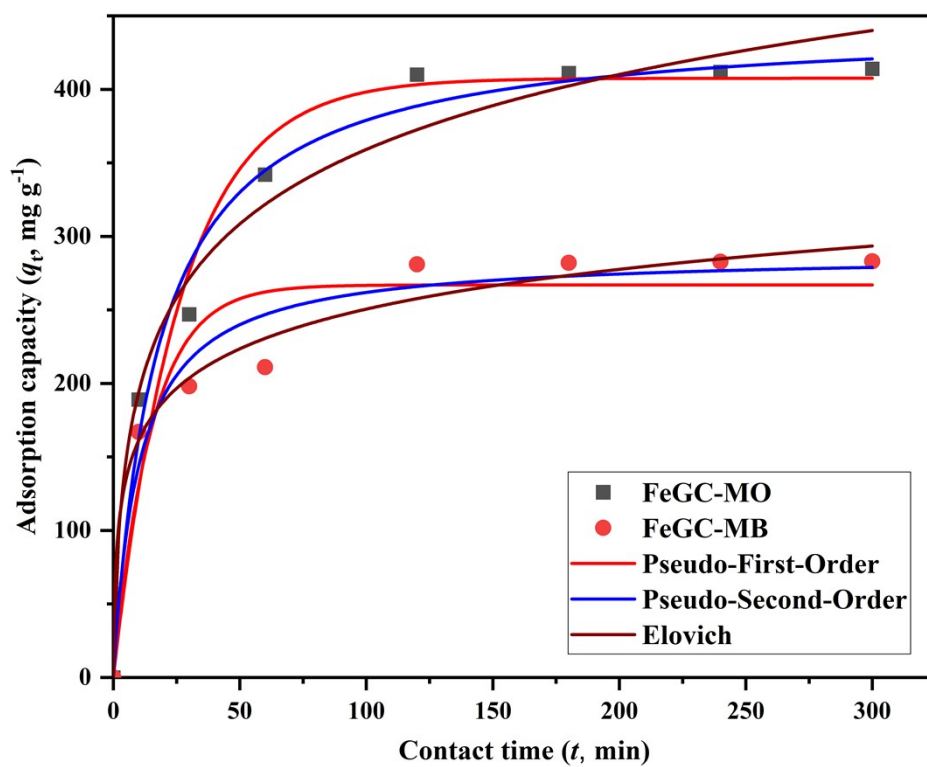

Fig. S7 Kinetic models non-linear fitting for removing Mo & MB adsorption using FeGC composite.

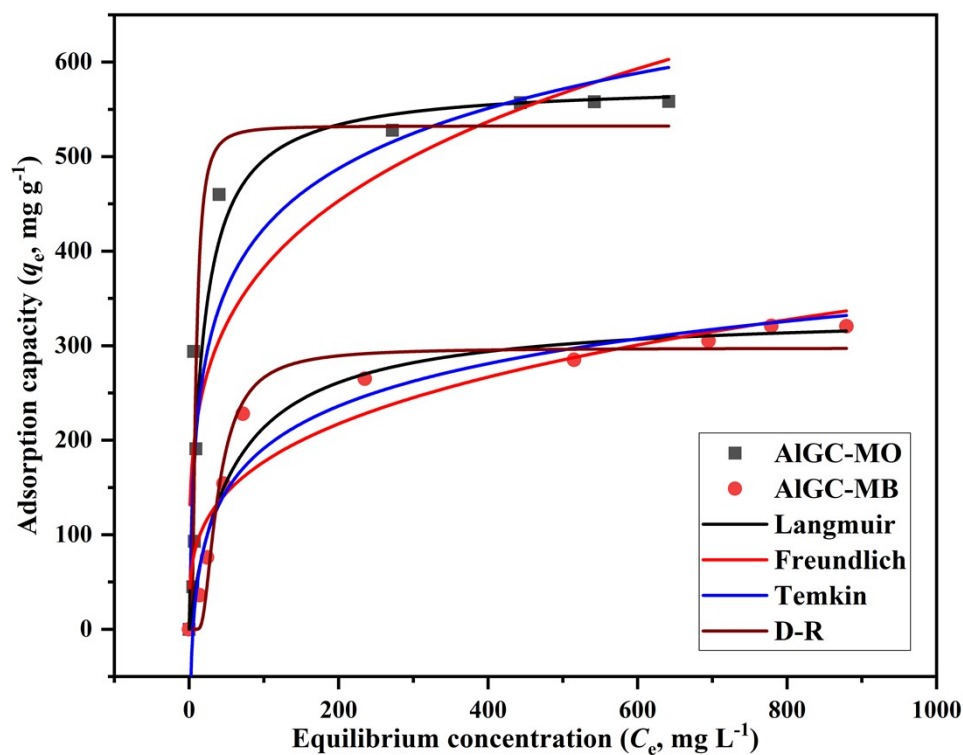

**Fig. S8** Applicability of different isotherm models for MO & MB removal using AIGC composite.

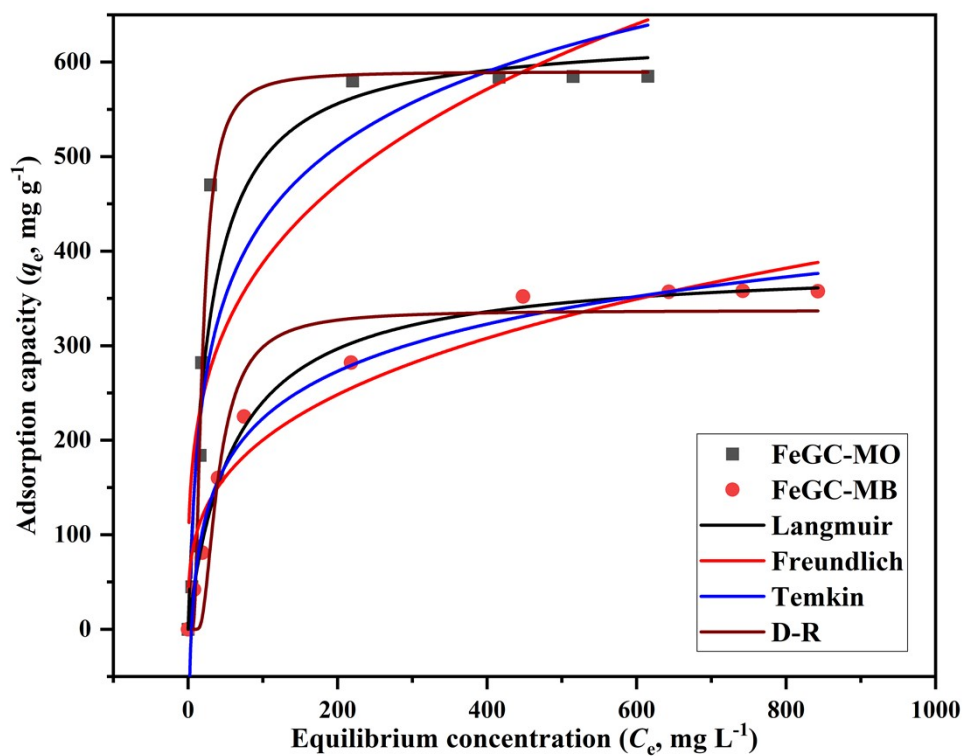

**Fig. S9** Applicability of different isotherm models for MO & MB removal using FeGC composite.

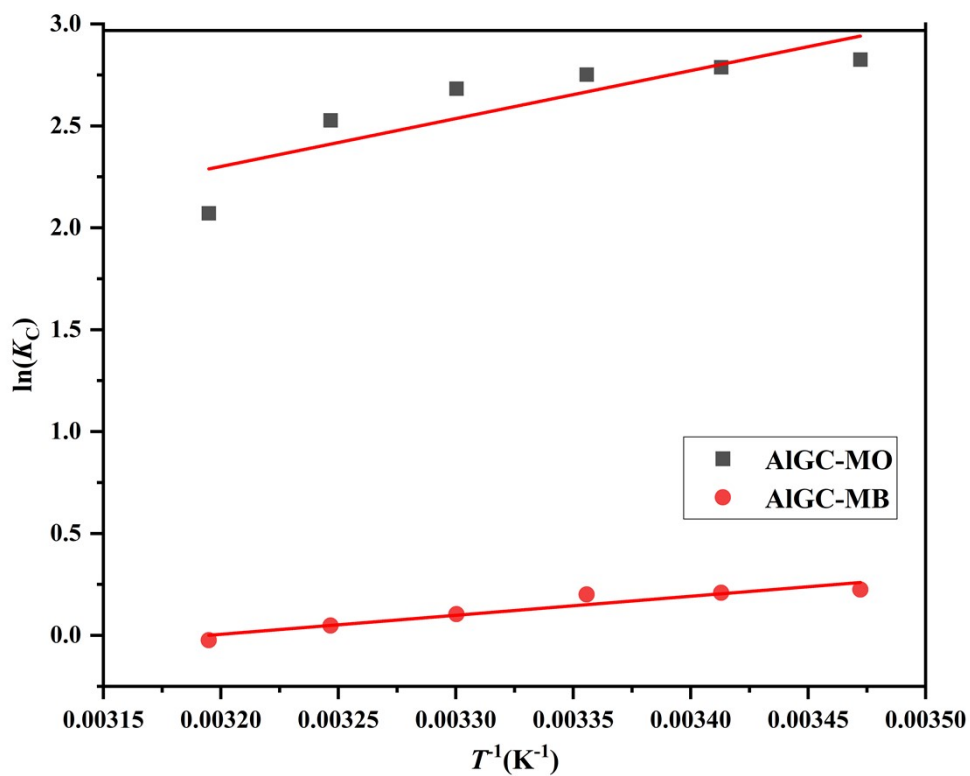

**Fig. S10** Van't Hoff linear fit for thermodynamic data for the MO & MB adsorption using AlGC composites.

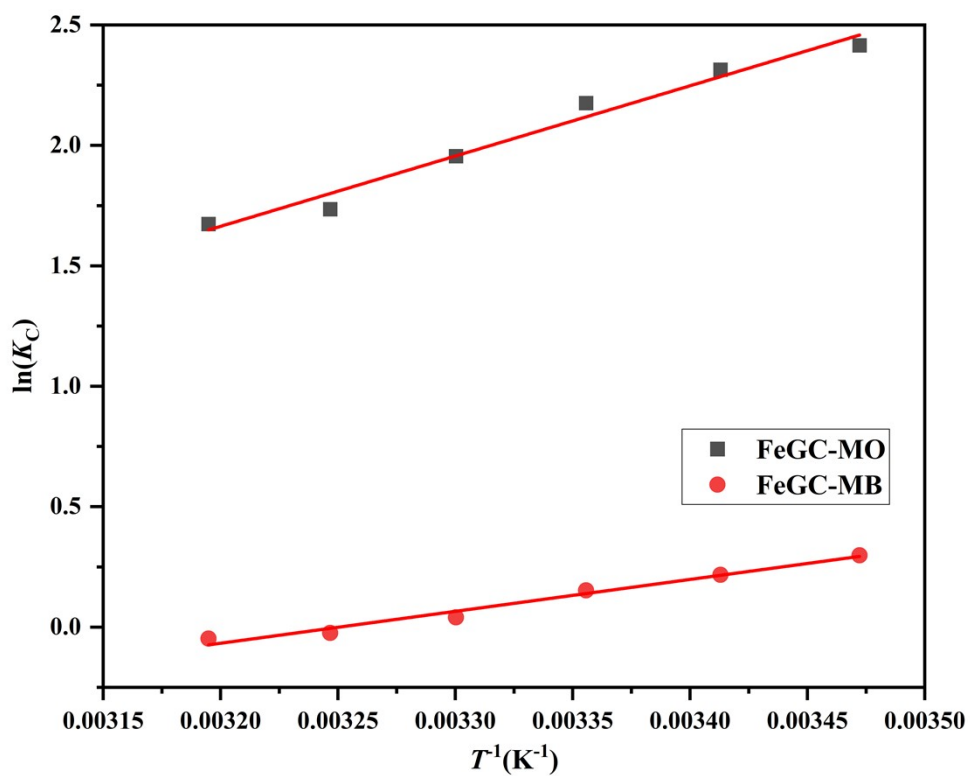

**Fig. S11** Van't Hoff linear fit for thermodynamic data for the MO & MB adsorption using FeGC composites.

**Table S1** L25 orthogonal array approach was used for the optimization process.

| Experiment | Factor A | Factor B | Factor C | Factor D |
|------------|----------|----------|----------|----------|
| 1          | 1        | 1        | 1        | 1        |
| 2          | 1        | 2        | 2        | 2        |
| 3          | 1        | 3        | 3        | 3        |
| 4          | 1        | 4        | 4        | 4        |
| 5          | 1        | 5        | 5        | 5        |
| 6          | 2        | 1        | 2        | 3        |
| 7          | 2        | 2        | 3        | 4        |
| 8          | 2        | 3        | 4        | 5        |
| 9          | 2        | 4        | 5        | 1        |
| 10         | 2        | 5        | 1        | 2        |
| 11         | 3        | 1        | 3        | 5        |
| 12         | 3        | 2        | 4        | 1        |
| 13         | 3        | 3        | 5        | 2        |
| 14         | 3        | 4        | 1        | 3        |
| 15         | 3        | 5        | 2        | 4        |
| 16         | 4        | 1        | 4        | 2        |
| 17         | 4        | 2        | 5        | 3        |
| 18         | 4        | 3        | 1        | 4        |
| 19         | 4        | 4        | 2        | 5        |
| 20         | 4        | 5        | 3        | 1        |
| 21         | 5        | 1        | 5        | 4        |
| 22         | 5        | 2        | 1        | 5        |
| 23         | 5        | 3        | 2        | 1        |
| 24         | 5        | 4        | 3        | 2        |
| 25         | 5        | 5        | 4        | 3        |

**Table S2** Experimental design matrix with a response for MO & MB removal using AlGC and FeGC composite.

| S. No. | Time (min) | Mass (mg) | Conc. (mg L <sup>-1</sup> ) | Temp. (°C) | AlGC                           |            |                                |            | FeGC                           |            |                                |            |
|--------|------------|-----------|-----------------------------|------------|--------------------------------|------------|--------------------------------|------------|--------------------------------|------------|--------------------------------|------------|
|        |            |           |                             |            | MO                             |            | MB                             |            | MO                             |            | MB                             |            |
|        |            |           |                             |            | <i>Q</i> (mg g <sup>-1</sup> ) | <i>S/N</i> |
| 1      | 10         | 10        | 100                         | 20         | 120.39                         | 41.61      | 118                            | 41.44      | 86.43                          | 38.73      | 74                             | 37.38      |
| 2      | 10         | 15        | 200                         | 25         | 205.79                         | 46.27      | 146.67                         | 43.33      | 191.38                         | 45.64      | 135                            | 42.61      |
| 3      | 10         | 20        | 300                         | 30         | 277.81                         | 48.87      | 171                            | 44.66      | 259.29                         | 48.28      | 165                            | 44.35      |
| 4      | 10         | 25        | 400                         | 35         | 266.7                          | 48.52      | 164                            | 44.3       | 248.18                         | 47.9       | 147                            | 43.35      |
| 5      | 10         | 30        | 500                         | 40         | 217.11                         | 46.73      | 202.67                         | 46.14      | 275.75                         | 48.81      | 216                            | 46.69      |
| 6      | 30         | 10        | 200                         | 30         | 376.59                         | 51.52      | 228                            | 47.16      | 327.2                          | 50.3       | 228                            | 47.16      |
| 7      | 30         | 15        | 300                         | 35         | 364.24                         | 51.23      | 186.67                         | 45.42      | 281.93                         | 49         | 170                            | 44.61      |
| 8      | 30         | 20        | 400                         | 40         | 169.77                         | 44.6       | 152                            | 43.64      | 274.73                         | 48.78      | 141                            | 42.98      |
| 9      | 30         | 25        | 500                         | 20         | 371.65                         | 51.4       | 193.6                          | 45.74      | 328.44                         | 50.33      | 175                            | 44.86      |
| 10     | 30         | 30        | 100                         | 25         | 80.42                          | 38.11      | 60                             | 35.56      | 83.22                          | 38.4       | 62                             | 35.85      |
| 11     | 60         | 10        | 300                         | 40         | 305.51                         | 49.7       | 189                            | 45.53      | 330.29                         | 50.38      | 228                            | 47.16      |
| 12     | 60         | 15        | 400                         | 20         | 395                            | 51.93      | 258.67                         | 48.25      | 388.94                         | 51.8       | 248                            | 47.89      |
| 13     | 60         | 20        | 500                         | 25         | 384.56                         | 51.7       | 245                            | 47.78      | 364.24                         | 51.23      | 240                            | 47.6       |
| 14     | 60         | 25        | 100                         | 30         | 64.21                          | 36.15      | 67.2                           | 36.55      | 64.69                          | 36.22      | 71.2                           | 37.05      |
| 15     | 60         | 30        | 200                         | 35         | 129.65                         | 42.26      | 118.67                         | 41.49      | 126.56                         | 42.05      | 118                            | 41.44      |
| 16     | 120        | 10        | 400                         | 25         | 378.49                         | 51.56      | 246                            | 47.82      | 395.11                         | 51.93      | 254                            | 48.1       |
| 17     | 120        | 15        | 500                         | 30         | 390.62                         | 51.84      | 272                            | 48.69      | 410.85                         | 52.27      | 265                            | 48.46      |
| 18     | 120        | 20        | 100                         | 35         | 81.8                           | 38.26      | 89                             | 38.99      | 82.48                          | 38.33      | 86                             | 38.69      |
| 19     | 120        | 25        | 200                         | 40         | 111.12                         | 40.92      | 145.6                          | 43.26      | 128.41                         | 42.17      | 138.4                          | 42.82      |
| 20     | 120        | 30        | 300                         | 20         | 180.06                         | 45.11      | 176                            | 44.91      | 163.6                          | 44.28      | 144                            | 43.17      |
| 21     | 180        | 10        | 500                         | 35         | 367.33                         | 51.3       | 252                            | 48.03      | 405.88                         | 52.17      | 216                            | 46.69      |
| 22     | 180        | 15        | 100                         | 40         | 96.72                          | 39.71      | 44.5                           | 32.97      | 74.08                          | 37.39      | 66.1                           | 36.4       |
| 23     | 180        | 20        | 200                         | 20         | 162.06                         | 44.19      | 161                            | 44.14      | 163.68                         | 44.28      | 128                            | 42.14      |
| 24     | 180        | 25        | 300                         | 25         | 230.89                         | 47.27      | 193.6                          | 45.74      | 208.67                         | 46.39      | 148.8                          | 43.45      |
| 25     | 180        | 30        | 400                         | 30         | 255.18                         | 48.14      | 192                            | 45.67      | 247.97                         | 47.89      | 123.33                         | 41.82      |



**Table S3** ANOVA for the adsorption capacity of AlGC and FeGC.

| Adsorbent- AlGC for MO |    |         |         |         |         |                |
|------------------------|----|---------|---------|---------|---------|----------------|
| Source                 | DF | Adj SS  | Adj MS  | F-Value | P-Value | % Contribution |
| Regression             | 4  | 262385  | 65596   | 21.83   | 0       |                |
| Time                   | 1  | 1731    | 1731    | 0.58    | 0.457   | 0.53           |
| Mass                   | 1  | 63338   | 63338   | 21.08   | 0       | 19.6           |
| Conc                   | 1  | 186708  | 186708  | 62.14   | 0       | 57.89          |
| Temp                   | 1  | 10608   | 10608   | 3.53    | 0.075   | 3.28           |
| Error                  | 20 | 60089   | 3004    |         |         |                |
| Total                  | 24 | 322474  |         |         |         |                |
| $r^2$                  |    |         |         | 77.64%  |         |                |
| Adsorbent- AlGC for MB |    |         |         |         |         |                |
| Regression             | 4  | 78046.8 | 19511.7 | 23.05   | 0       |                |
| Time                   | 1  | 463.6   | 463.6   | 0.55    | 0.468   | 0.48           |
| Mass                   | 1  | 10134   | 10134   | 11.97   | 0.002   | 10.67          |
| Conc                   | 1  | 63786.6 | 63786.6 | 75.37   | 0       | 67.16          |
| Temp                   | 1  | 3662.5  | 3662.5  | 4.33    | 0.051   | 3.85           |
| Error                  | 20 | 16927.4 | 846.4   |         |         |                |
| $r^2$                  |    |         |         | 78.61%  |         |                |
| Adsorbent- FeGC for MO |    |         |         |         |         |                |
| Regression             | 4  | 288748  | 72187   | 49.42   | 0       |                |
| Time                   | 1  | 549     | 549     | 0.38    | 0.547   | 0.17           |
| Mass                   | 1  | 55405   | 55405   | 37.93   | 0       | 17.42          |
| Conc                   | 1  | 232047  | 232047  | 158.85  | 0       | 72.97          |
| temp                   | 1  | 747     | 747     | 0.51    | 0.483   | 0.23           |
| Error                  | 20 | 29216   | 1461    |         |         |                |
| $r^2$                  |    |         |         | 88.97%  |         |                |
| Adsorbent- FeGC for MB |    |         |         |         |         |                |
| Regression             | 4  | 71562.3 | 17890.6 | 15.15   | 0       |                |
| Time                   | 1  | 235.1   | 235.1   | 0.2     | 0.66    | 0.24           |
| Mass                   | 1  | 15384   | 15384   | 13.03   | 0.002   | 16.16          |
| Conc                   | 1  | 55866.9 | 55866.9 | 47.3    | 0       | 58.69          |
| Temp                   | 1  | 76.4    | 76.4    | 0.06    | 0.802   | 0.08           |
| Error                  | 20 | 23621.1 | 1181.1  |         |         |                |
| Total                  | 24 | 95183.4 |         |         |         |                |
| $r^2$                  |    |         |         | 75.18%  |         |                |

## References

- 1 S. D. Perera, R. G. Mariano, K. Vu, N. Nour, O. Seitz, Y. Chabal and K. J. Balkus, *ACS Catalysis*, 2012, **2**, 949–956.
- 2 A. Giménez-Pérez, S. K. Bikkarolla, J. Benson, C. Bengoa, F. Stüber, A. Fortuny, A. Fabregat, J. Font and P. Papakonstantinou, *Journal of Materials Science*, 2016, **51**, 8346–8360.
- 3 M. Lu, L. Li, S. Shen, D. Chen and W. Han, *New Journal of Chemistry*, 2019, **43**, 1032–1037.
- 4 T. Chowdhury, L. Zhang, J. Zhang and S. Aggarwal, *Materials Advances*, 2021, **2**, 3051–3059.
- 5 R. A. Rochman, S. Wahyuningsih, A. H. Ramelan and Q. A. Hanif, *IOP Conference Series: Materials Science and Engineering*, 2019, **509**, 012119.
- 6 M. Bera, Chandravati, P. Gupta and P. K. Maji, *Journal of Nanoscience and Nanotechnology*, 2018, **18**, 902–912.
